# Supplementary material for: Metal-organic frameworks with photocatalytic bactericidal activity for integrated air cleaning
Source: PubMed Central journal article supplement (PMC6522529; doi:10.1038/s41467-019-10218-9), 2019-05-16
Supplement: 41467_2019_10218_MOESM1_ESM.pdf [file 41467_2019_10218_MOESM1_ESM.pdf]

## **Supplementary Information**

### **Metal-organic frameworks with photocatalytic bactericidal activity for integrated air cleaning**

Li et al.

## Supplementary Methods

Anatase TiO<sub>2</sub> (25 nm, 99.8%) and ZnO (50 nm, 99.8%) were purchased from Macklin Biochemical Co. Ltd. Nutrient broth (NB, BR) and nutrient agar (NA, BR) were received from Beijing Aoboxing biotech Company (Beijing, China). *E. coli* (CPCC 100522 (Chinese Academy of Medical Sciences)) were selected as bacterial strains. All other chemicals and solvents were purchased from commercial suppliers including J&K Scientific Co. Ltd., Sigma-Aldrich Co. Ltd., Energy Chemical Co. Ltd., Beijing Chemical Reagent Company, and used without further purification. Non-woven fabric employed in this work is the spunlaced non-woven fabric with polyethylene (PE) and polyethylene terephthalate (PET) (1:2). It has a fiber diameter of ca. 12 μm, thickness of 0.190 mm, density of 1.4 g cm<sup>-3</sup>, maximum pore size of 116.6 μm, average pore size of 56.1 μm and porosity of 69.7%.

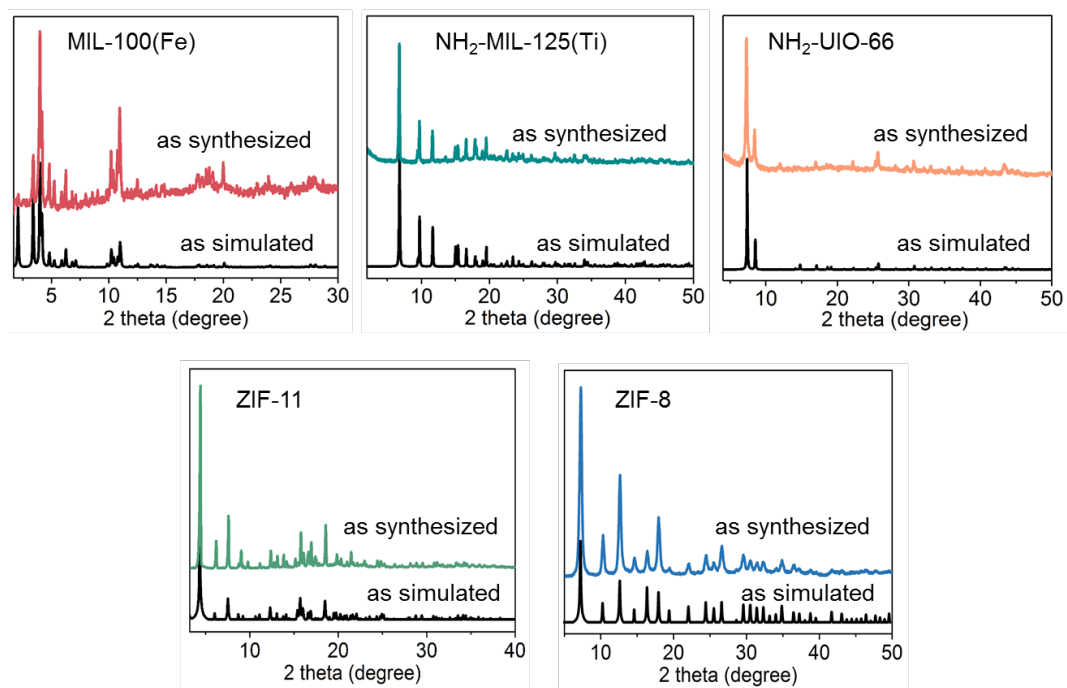

**Supplementary Figure 1** PXR D patterns of MIL-100(Fe), NH<sub>2</sub>-MIL-125(Ti), NH<sub>2</sub>-UIO-66, ZIF-11 and ZIF-8.

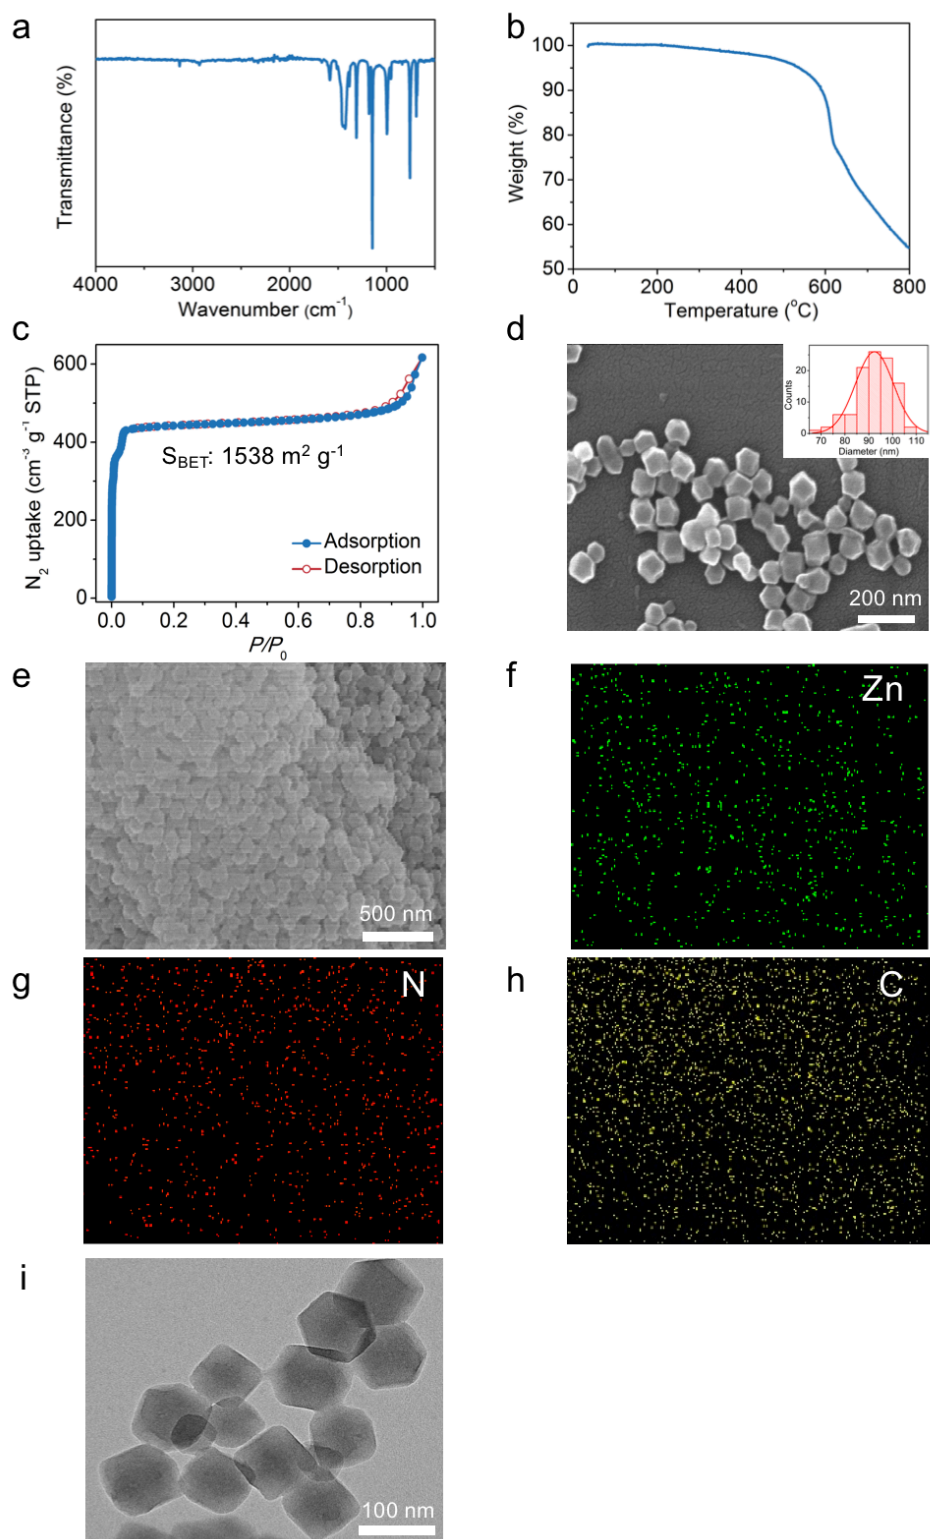

**Supplementary Figure 2** **a** FT-IR spectra, **b** TG curve, **c**  $\text{N}_2$  sorption isotherms measured at 77 K, **d** SEM image and size distribution (insert), **e-h** elemental mapping analysis, **i** TEM image of ZIF-8.



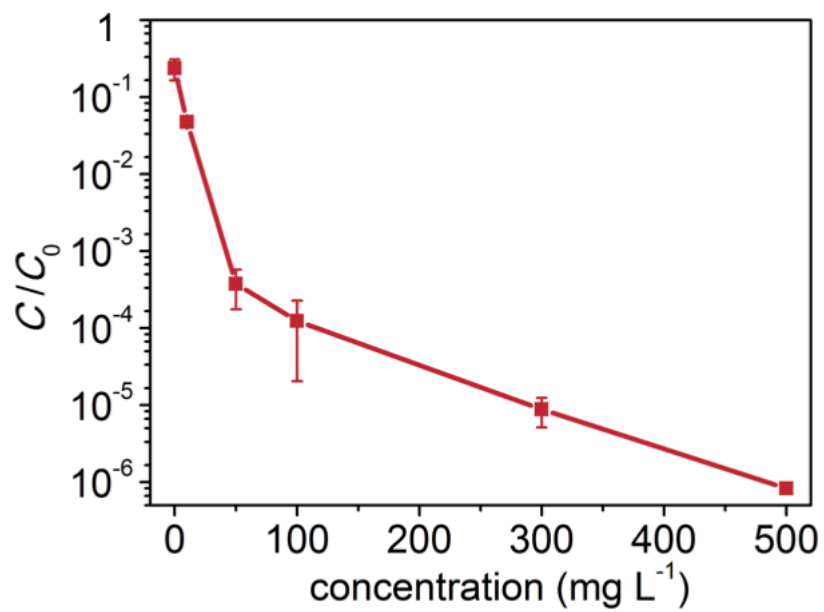

**Supplementary Figure 3.** Photocatalytic disinfection performance of ZIF-8 at different dosage levels. The error bars are calculated *via* repeating the measurements for three times.

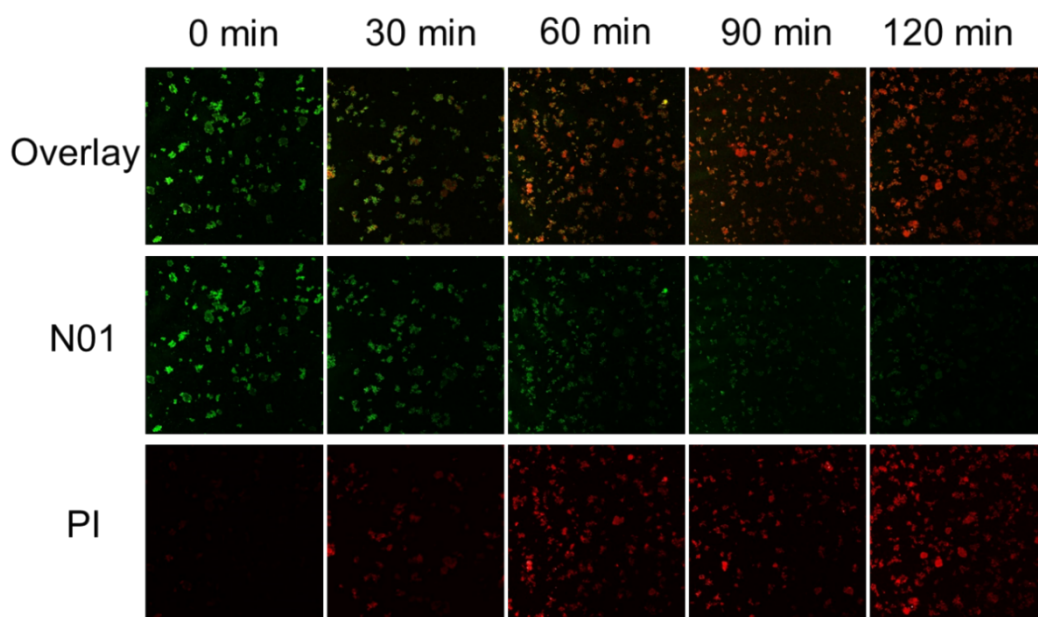

**Supplementary Figure 4.** Confocal fluorescence images of *E. coli* stained with N01 (live cells, green fluorescence) and PI (dead cells, red fluorescence), after cells ( $10^7$  CFU mL<sup>-1</sup>) photocatalytically treated by ZIF-8 (500 mg L<sup>-1</sup>) under sunlight irradiation for 0 min, 30 min, 60 min, 90 min and 120 min respectively.

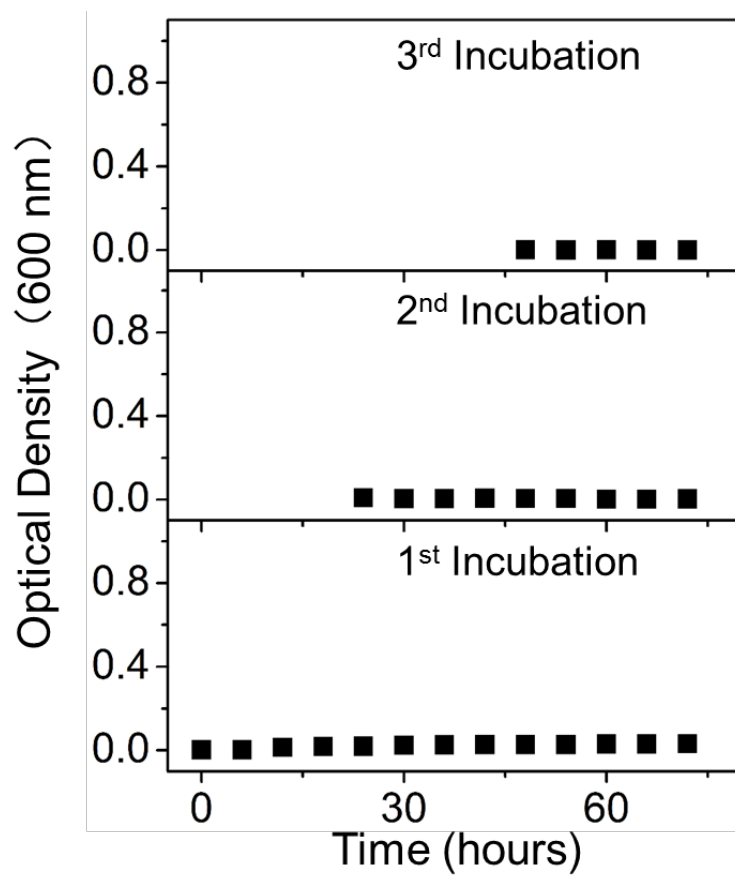

**Supplementary Figure 5.** Regrowth test of *E. coli* after photocatalytically treated by ZIF-8. The 1<sup>st</sup>, 2<sup>nd</sup> and 3<sup>rd</sup> incubation indicate regrowth at 0 h, 24 h and 48 h after photo disinfection experiment.

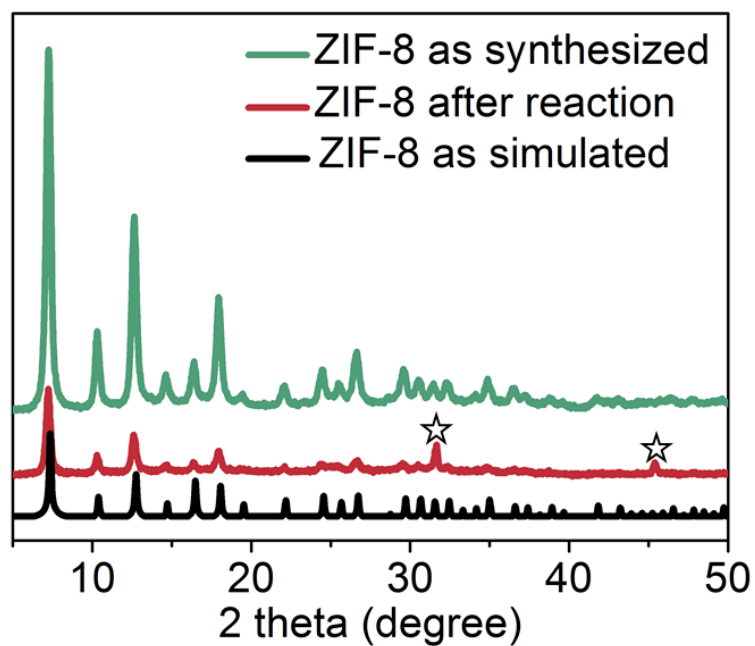

**Supplementary Figure 6.** PXPD patterns of simulated and as-synthesized ZIF-8 along with ZIF-8 after photocatalytic reaction. The peaks marked with pentagram represent the characteristic diffraction signals of NaCl.

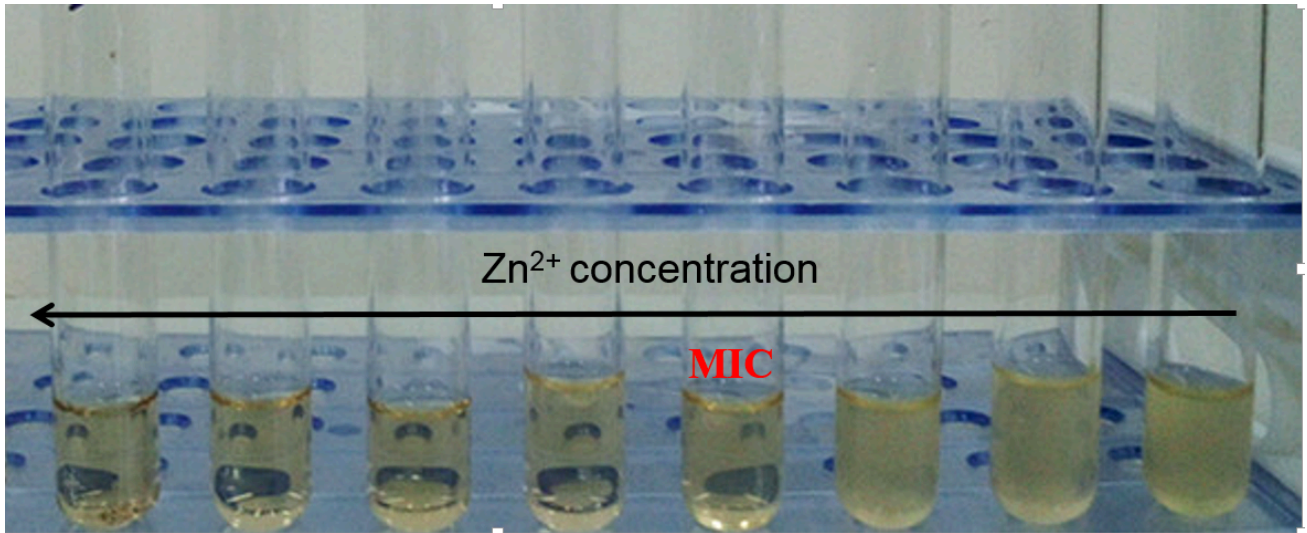

**Supplementary Figure 7.** The optical images showing MIC measurement results.

**Supplementary Table 1** The values of MIC and MBC of Zn<sup>2+</sup> against *E.coli* strain.

|                  | MIC (mg/L)    | MBC (mg/L) |
|------------------|---------------|------------|
|                  | <i>E.coli</i> |            |
| Zn <sup>2+</sup> | 31.25         | 250        |

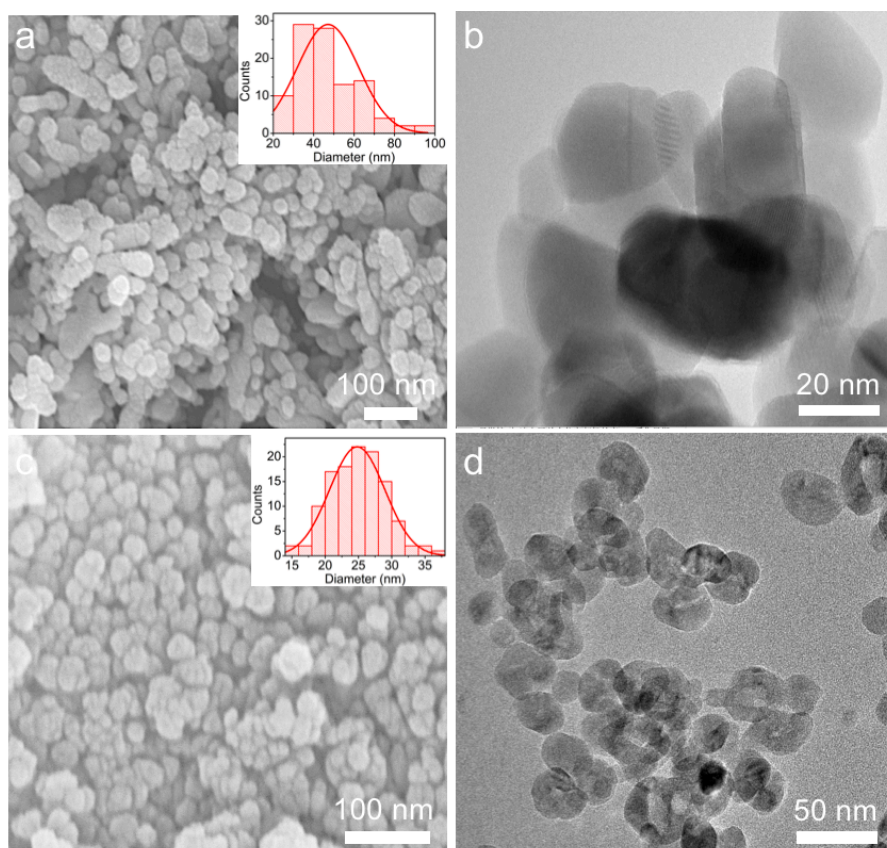

**Supplementary Figure 8.** **a** SEM and **b** TEM images of ZnO, **c** SEM and **d** TEM images of TiO<sub>2</sub>.

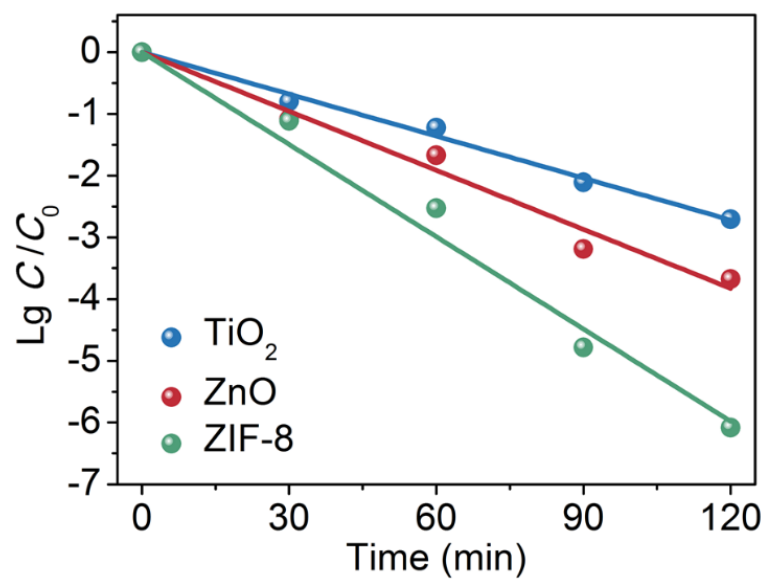

**Supplementary Figure 9.** Inactivation kinetics on TiO<sub>2</sub>, ZnO and ZIF-8



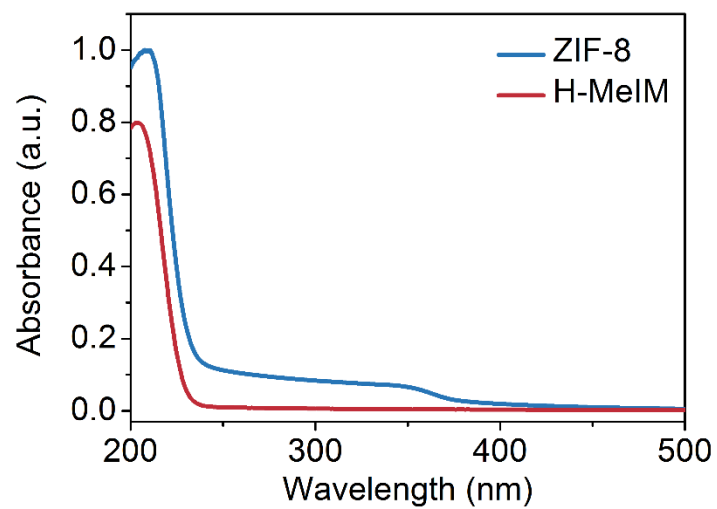

**Supplementary Figure 10.** UV-vis diffuse reflectance spectra of ZIF-8 and H-MeIM.

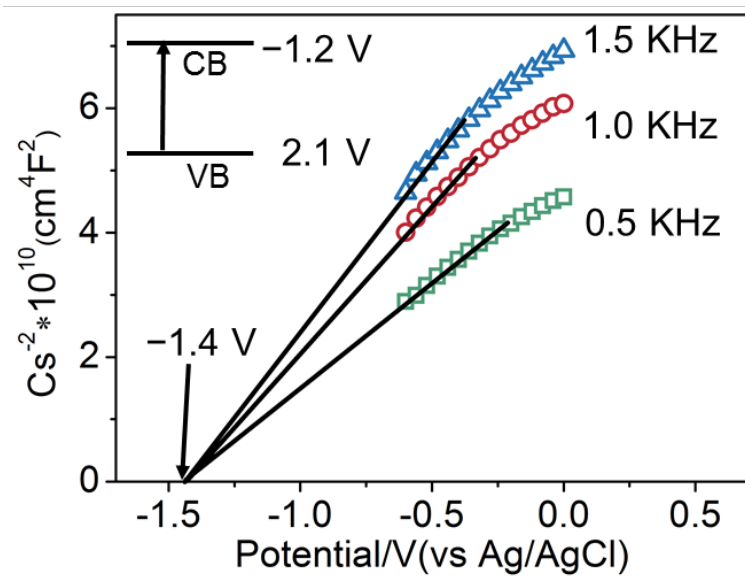

**Supplementary Figure 11.** The Mott-Schottky plots of ZIF-8.

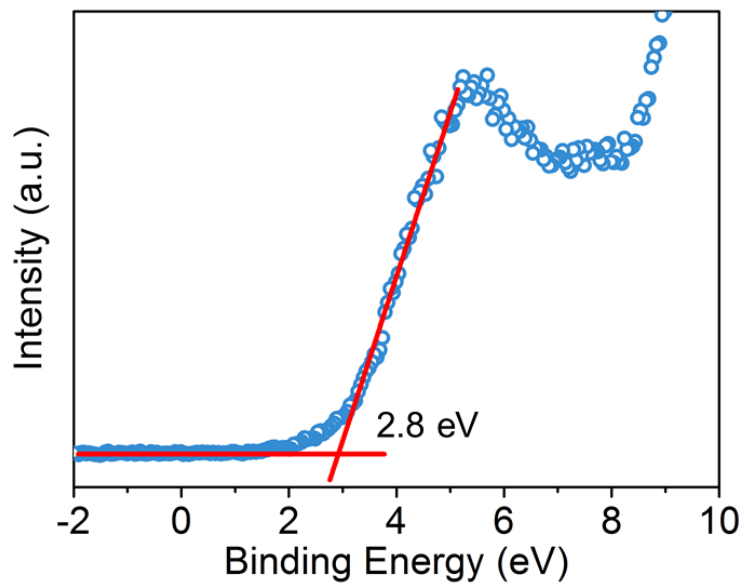

**Supplementary Figure 12.** The VB-XPS spectra of ZIF-8.

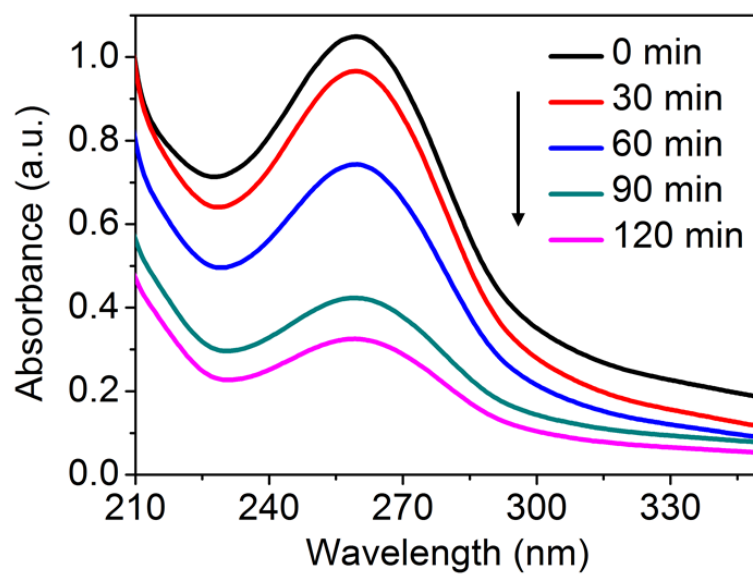

**Supplementary Figure 13.** Time-dependent absorption spectra of nitroblue tetrazolium (NBT) for  $\bullet\text{O}_2^-$  detection

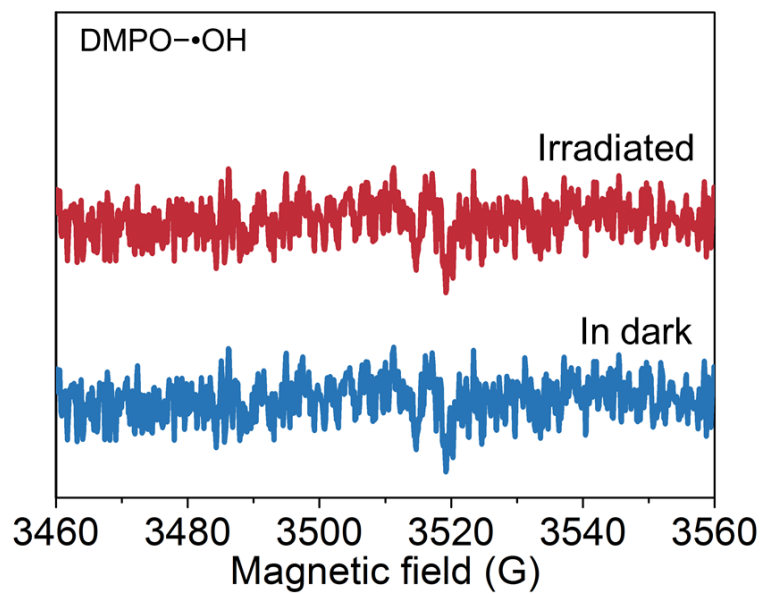

**Supplementary Figure 14.** EPR spectra of DMPO-•OH recorded in ZIF-8 aqueous solution suspension under light and dark conditions.

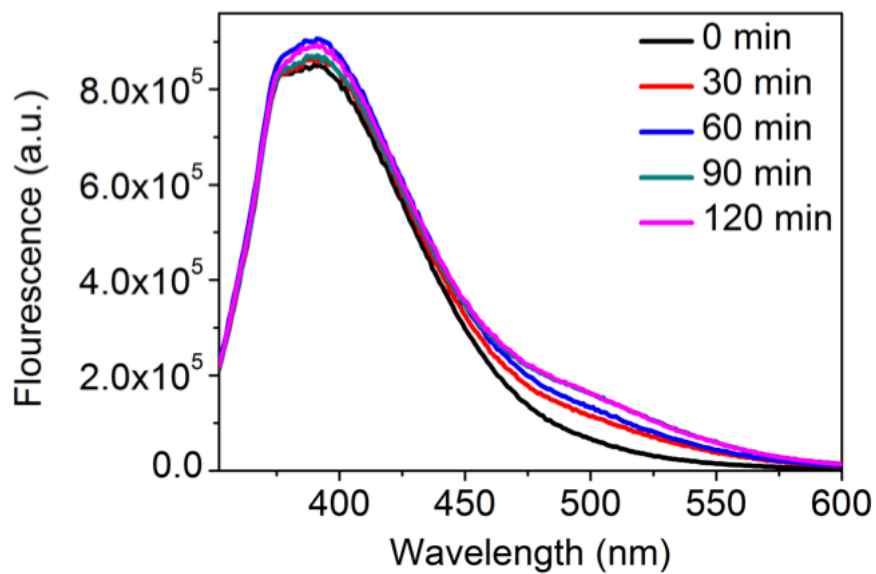

**Supplementary Figure 15.** Time-dependent fluorescence spectra of generated 7-hydroxycoumarin in ZIF-8 reaction system for  $\bullet\text{OH}$  detection. 7-hydroxycoumarin could emit fluorescence at 455 nm when excited at 332 nm.

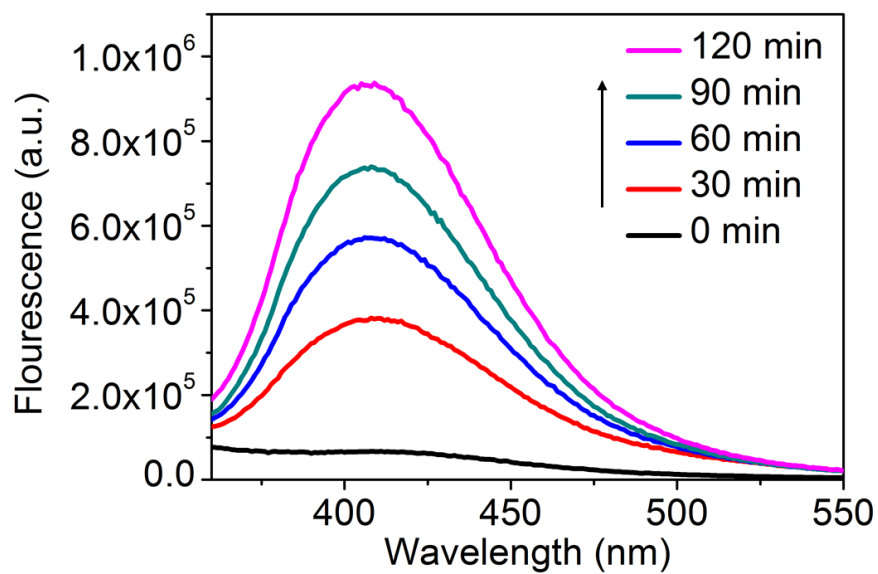

**Supplementary Figure 16.** Time-dependent fluorescence spectra of produced p-hydroxyphenylacetic acid dimer in reaction system for H<sub>2</sub>O<sub>2</sub> detection.

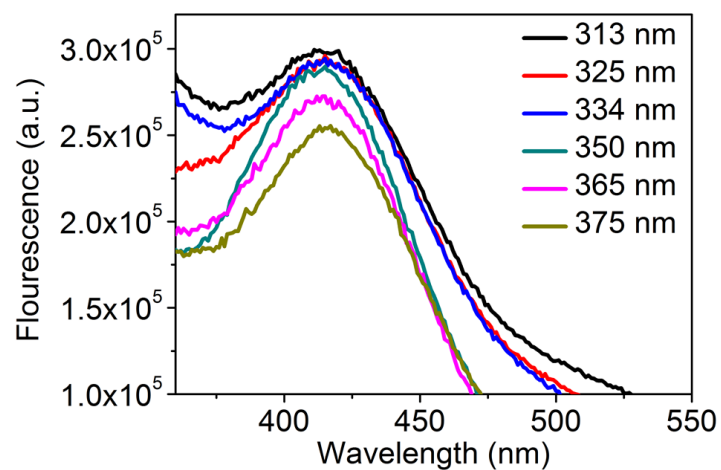

**Supplementary Figure 17.** Fluorescence spectra of produced p-hydroxyphenylacetic acid dimer in ZIF-8 reaction system. ZIF-8 suspensions were irradiated by single-wavelength incident light with wavelength ranging from 313 to 375 nm respectively.



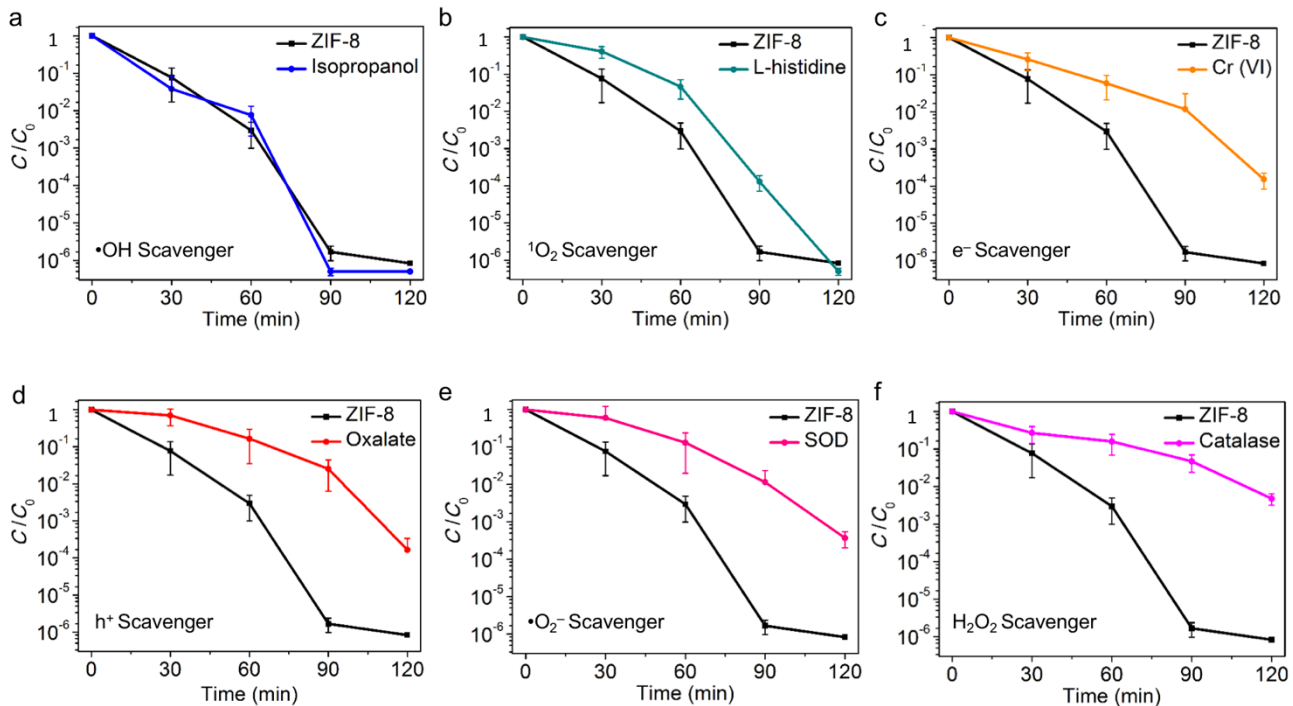

**Supplementary Figure 18.** **a** Photocatalytic disinfection performance with scavenger isopropanol to quench photo generated  $\bullet\text{OH}$ , **b** L-histidine to quench photo generated  $^1\text{O}_2$ , **c** sodium chromate to quench photo generated  $e^-$ , **d** sodium oxalate to quench photo generated  $h^+$ , **e** SOD to quench photo generated  $\bullet\text{O}_2^-$ , **f** catalase to quench photo generated  $\text{H}_2\text{O}_2$ . The error bars are calculated *via* repeating the measurements for three times.

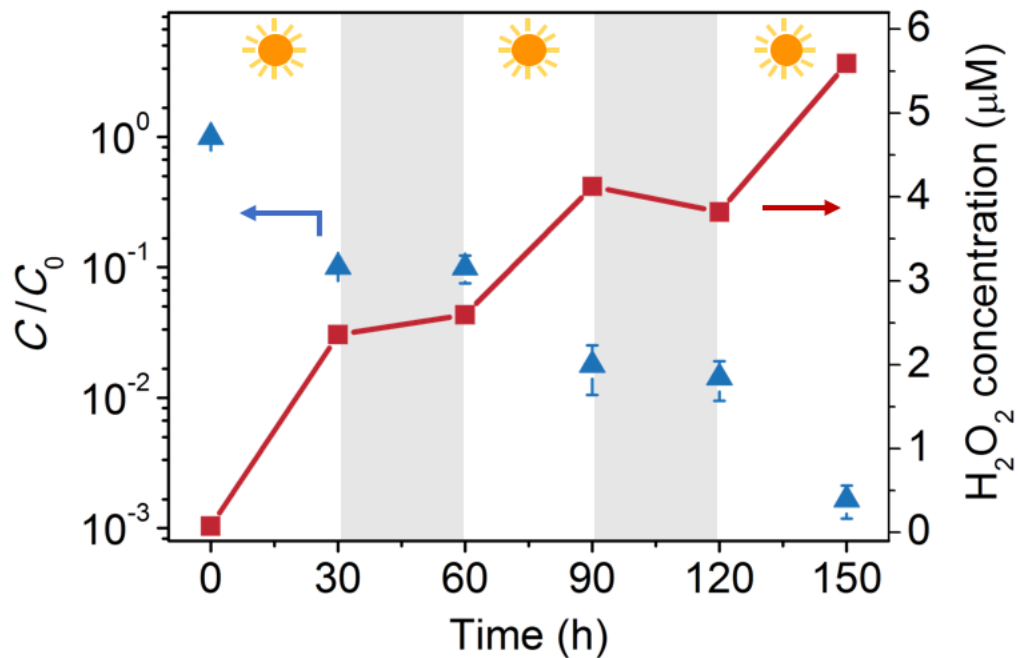

**Supplementary Figure 19.** Disinfection performance of ZIF-8 and the concentration of generated  $H_2O_2$  versus time under the alternated light and dark conditions (irradiation in white and dark periods in gray). The error bars are calculated *via* repeating the measurements for three times.

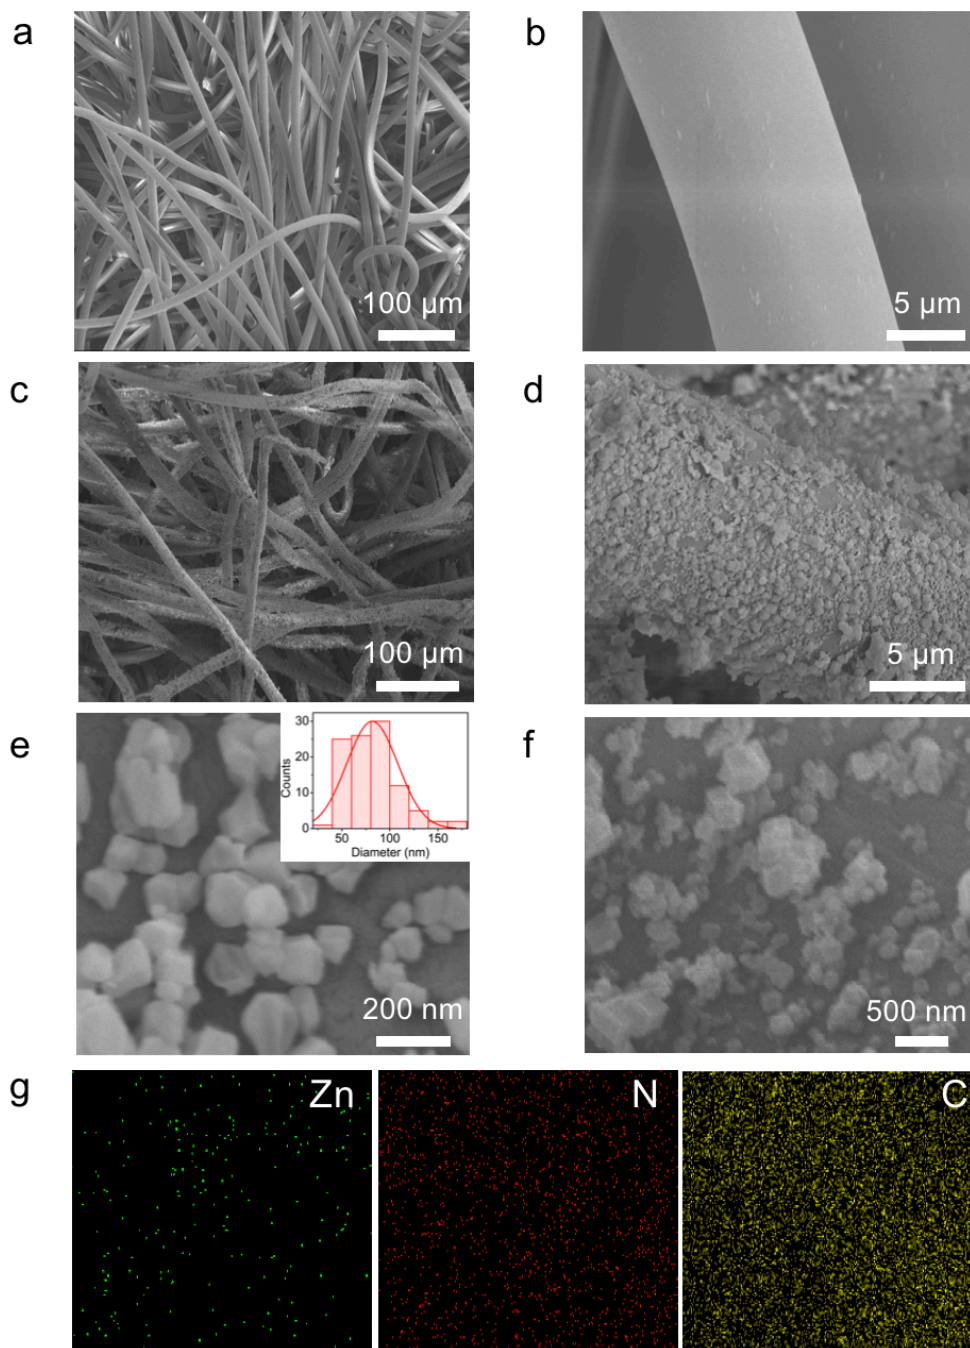

**Supplementary Figure 20.** a, b SEM images of NWF, c, d, e SEM images of MOFilter and size distribution of ZIF-8 particles grown on fibers (insert), f, g corresponding elemental mapping images.

**Supplementary Table 2.** The weight change of MOFilter after continuously bended and rubbed for 1000 times.

| <b>Sample</b> | <b>m<sub>1</sub> (mg)</b> | <b>m<sub>2</sub> (mg)</b> | <b>Δm (mg)</b> |
|---------------|---------------------------|---------------------------|----------------|
| 1             | 223.97                    | 223.65                    | 0.32           |
| 2             | 213.17                    | 213.02                    | 0.15           |
| 3             | 207.57                    | 207.41                    | 0.16           |
| 4             | 218.76                    | 218.51                    | 0.25           |
| 5             | 214.88                    | 214.27                    | 0.61           |
| 6             | 212.49                    | 212.33                    | 0.16           |
| 7             | 219.85                    | 219.80                    | 0.05           |
| 8             | 211.33                    | 211.09                    | 0.24           |
| 9             | 210.22                    | 310.13                    | 0.09           |
| 10            | 233.55                    | 233.19                    | 0.36           |

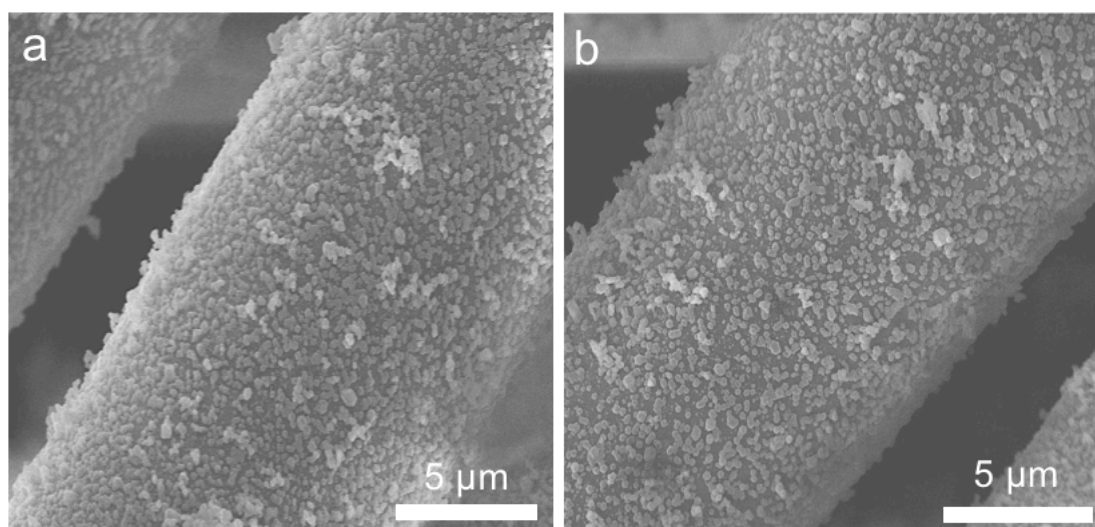

**Supplementary Figure 21.** SEM images of MOFilter **a** before and **b** after bended and rubbed repeatedly for 1000 times.

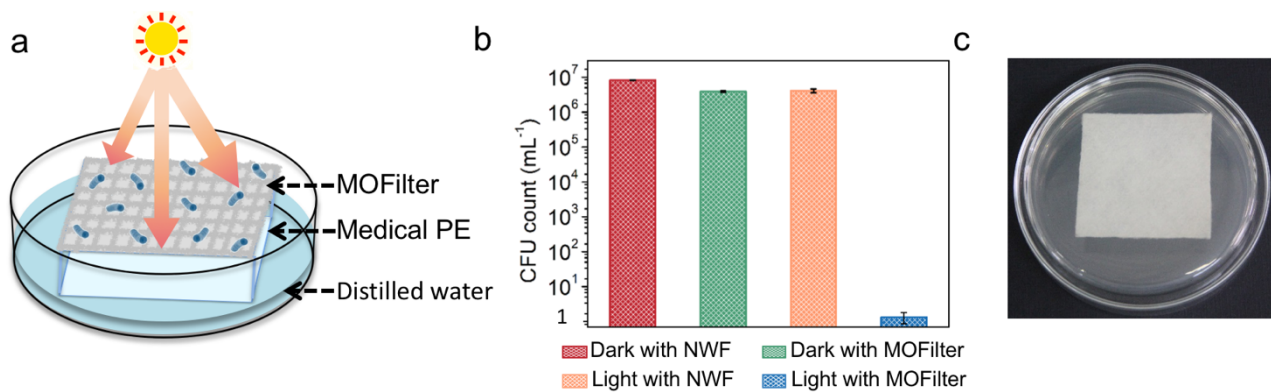

**Supplementary Figure 22.** **a** Schematic representation of the test method for surface disinfection under light irradiation. **b** Comparison of the number of viable cells present in eluent used for collecting living bacteria on MOFilter after reaction. **c** The bacterial colonies residual on eluent-treated MOFilter after photocatalytic reaction. The error bars are calculated *via* repeating the measurements for three times.

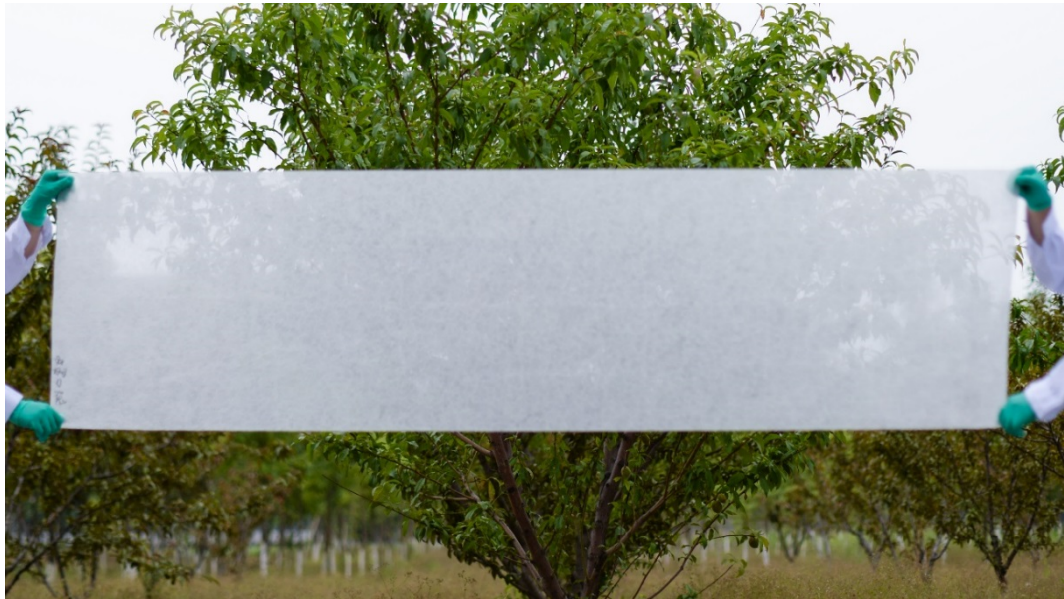

**Supplementary Figure 23.** The optical image of MOFilter with a large area.

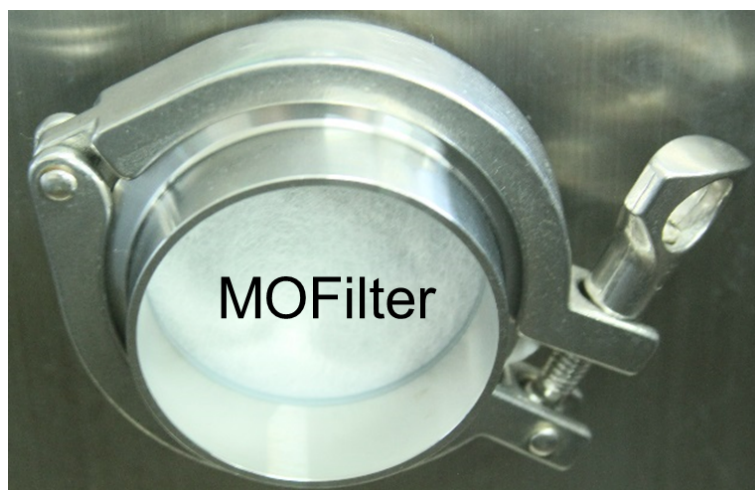

**Supplementary Figure 24.** The optical image of MOFilter fixed in device.



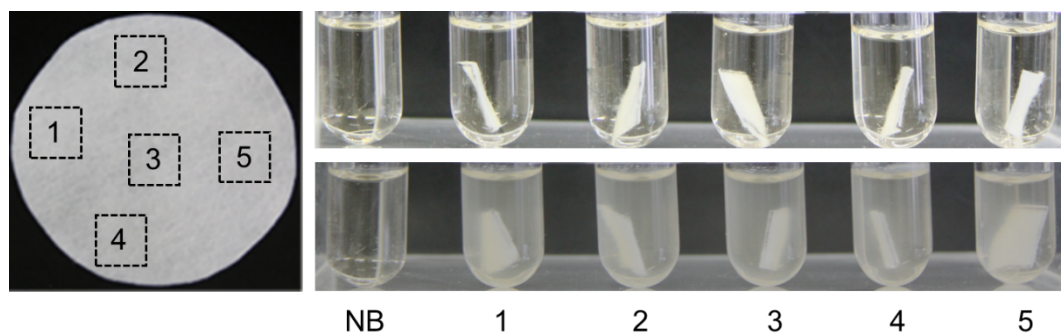

**Supplementary Figure 25.** After photocatalytic reaction, MOFilter and NWF (samples represented by *light with MOFilter* and *light with NWF* respectively in Figure 4e) were cut into five pieces respectively, and immersed in nutrient broth (NB) solution for 20 h at 37 °C for confirmation of residual viable cells on filter (top row for MOFilter and bottom row for NWF).

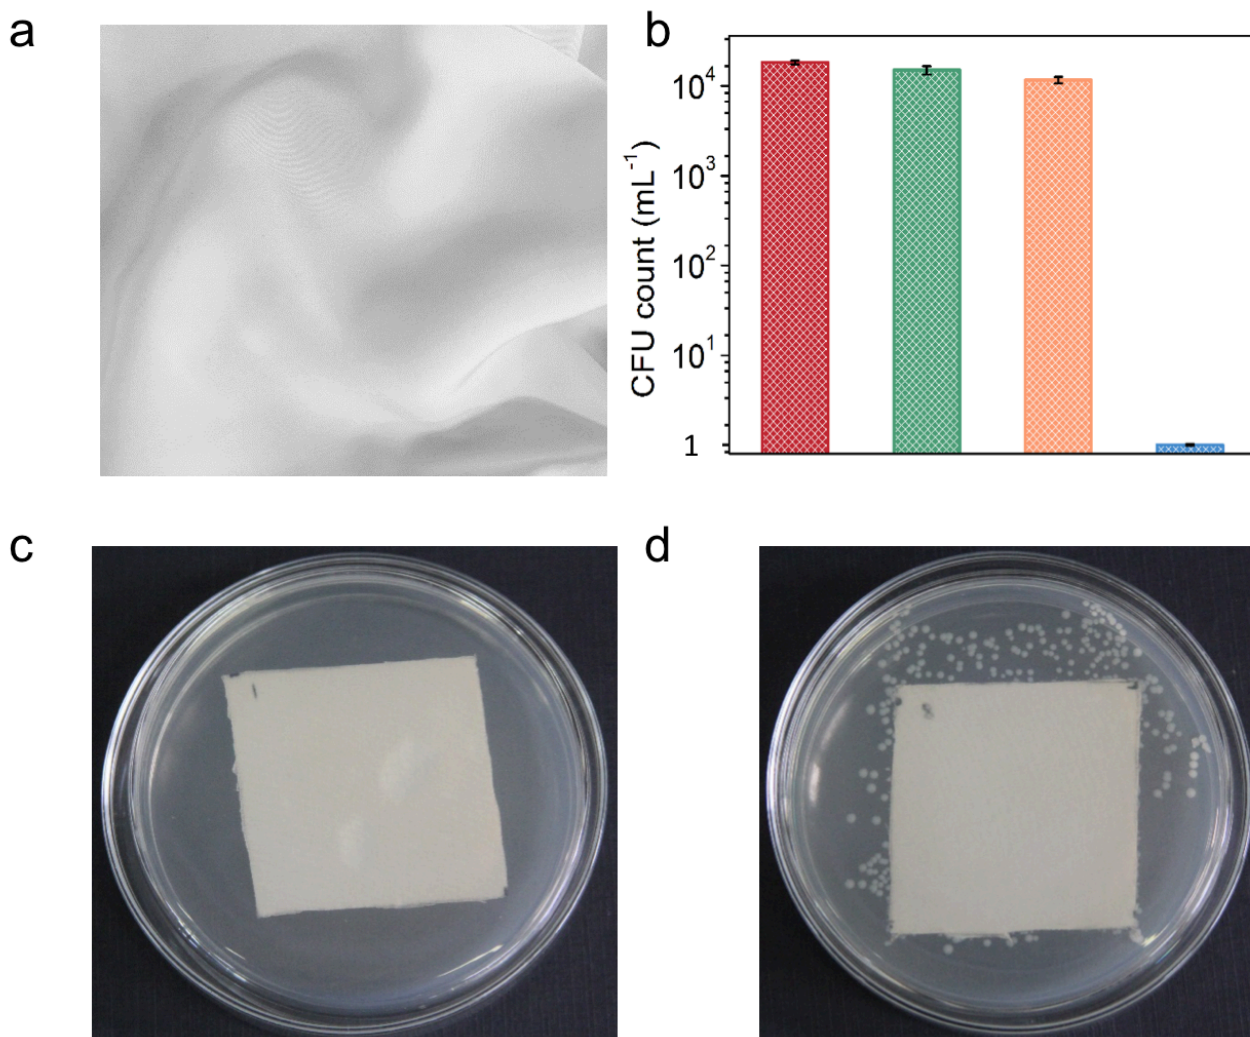

**Supplementary Figure 26.** **a** Optical image of silk substrate used for MOFilter fabrication. **b** Comparison of the number of viable cells present in eluent used for collecting living bacteria on MOFilter (silk as substrate) after reaction. **c, d** The bacterial colonies residual on eluent-treated MOFilter (silk as substrate) **c** and silk substrate **d** after photocatalytic reaction. The error bars are calculated *via* repeating the measurements for three times.
